# Supplementary material for: The Burden of Burnout among Healthcare Professionals of Intensive Care Units and Emergency Departments during the COVID-19 Pandemic: A Systematic Review
Source: MDPI journal article supplement (doi:10.3390/ijerph18158172), 2021-08-02
Supplement: s1 [file s1]

## Supplementary Material S1 – Search strategy

|                                                                                                                                                                                                                                                                                                                                                                                                                                                                                                                                                                                                                                                                                                                                                                                                                                                                                                                                                                                                                                                                                                                                                |
|------------------------------------------------------------------------------------------------------------------------------------------------------------------------------------------------------------------------------------------------------------------------------------------------------------------------------------------------------------------------------------------------------------------------------------------------------------------------------------------------------------------------------------------------------------------------------------------------------------------------------------------------------------------------------------------------------------------------------------------------------------------------------------------------------------------------------------------------------------------------------------------------------------------------------------------------------------------------------------------------------------------------------------------------------------------------------------------------------------------------------------------------|
| <b>PubMed</b>                                                                                                                                                                                                                                                                                                                                                                                                                                                                                                                                                                                                                                                                                                                                                                                                                                                                                                                                                                                                                                                                                                                                  |
| "Anesthesia"[MeSH Terms] OR "Anesthesia"[Title/Abstract] OR "anaesthesia"[Title/Abstract] OR "Anesthesiology"[MeSH Terms] OR "anaesthesiology"[Title/Abstract] OR "Anesthesiology"[Title/Abstract] OR "Anesthetists"[MeSH Terms] OR "anesthetist*"[Title/Abstract] OR "anaesthetist*"[Title/Abstract] OR "anesthesiologist*"[Title/Abstract] OR "anaesthesiologist*"[Title/Abstract] OR "Critical Care"[MeSH Terms] OR "Critical Care"[Title/Abstract] OR "intensive care"[Title/Abstract] OR "intensivist*"[Title/Abstract] OR "Intensive Care Units"[MeSH Terms] OR "Emergency Medical Services"[MeSH Terms] OR "emergency medical service*"[Title/Abstract] OR "emergenc*"[Title/Abstract] OR "resuscitation"[Title/Abstract] OR "resuscitator*"[Title/Abstract] OR "emergency department*"[Title/Abstract] OR "emergency-room"[Title/Abstract] OR "health care workers"[Title/Abstract] OR "health care worker"[Title/Abstract] OR "health worker*"[Title/Abstract] OR "health care provider*"[Title/Abstract] OR "health care personnel"[Title/Abstract] OR "health care professional*"[Title/Abstract] OR "Health Personnel"[MeSH Terms] |
| <b>AND</b>                                                                                                                                                                                                                                                                                                                                                                                                                                                                                                                                                                                                                                                                                                                                                                                                                                                                                                                                                                                                                                                                                                                                     |
| "severe-acute-respiratory-syndrome-coronavirus-2"[Supplementary Concept] OR "severe-acute-respiratory-syndrome-coronavirus-2"[Title/Abstract] OR "SARS-Coronavirus-2"[Title/Abstract] OR "sars cov 2"[Title/Abstract] OR "nCoV"[Title/Abstract] OR "novel-coronavirus"[Title/Abstract] OR "novel-coronavirus"[Title/Abstract] OR "new-coronavirus"[Title/Abstract] OR "new-corona-virus"[Title/Abstract] OR "2019nCoV"[Title/Abstract] OR "2019-nCoV"[Title/Abstract] OR "coronavirus-disease-2019"[Title/Abstract] OR "corona-virus-disease-2019"[Title/Abstract] OR "coronavirus-disease-19"[Title/Abstract] OR "corona-virus-disease-19"[Title/Abstract] OR "covid*"[Title/Abstract] OR "Coronavirus"[Title/Abstract] OR "COVID-19"[Supplementary Concept] OR "pandemic s"[Title/Abstract] OR "pandemically"[Title/Abstract] OR "pandemicity"[Title/Abstract] OR "pandemics"[MeSH Terms] OR "pandemics"[Title/Abstract] OR "pandemic"[Title/Abstract]                                                                                                                                                                                       |
| <b>AND</b>                                                                                                                                                                                                                                                                                                                                                                                                                                                                                                                                                                                                                                                                                                                                                                                                                                                                                                                                                                                                                                                                                                                                     |
| "burnout"[Title/Abstract] OR "burn-out"[Title/Abstract] OR "burnout, psychological"[MeSH Terms] OR "Occupational Stress"[MeSH Terms] OR "Occupational Stress"[Title/Abstract]                                                                                                                                                                                                                                                                                                                                                                                                                                                                                                                                                                                                                                                                                                                                                                                                                                                                                                                                                                  |

|                                                                                                                                                                                                                                                                                                                                                                                                                                                                                                                                                                                                                                                                                                                                                                                                                                                                                                                                                                                                                                                                                                                                                                         |
|-------------------------------------------------------------------------------------------------------------------------------------------------------------------------------------------------------------------------------------------------------------------------------------------------------------------------------------------------------------------------------------------------------------------------------------------------------------------------------------------------------------------------------------------------------------------------------------------------------------------------------------------------------------------------------------------------------------------------------------------------------------------------------------------------------------------------------------------------------------------------------------------------------------------------------------------------------------------------------------------------------------------------------------------------------------------------------------------------------------------------------------------------------------------------|
| <b>Embase</b>                                                                                                                                                                                                                                                                                                                                                                                                                                                                                                                                                                                                                                                                                                                                                                                                                                                                                                                                                                                                                                                                                                                                                           |
| 'anesthesiologist'/exp OR 'intensive care unit'/exp OR 'intensive care'/exp OR 'emergency health service'/exp OR 'anesthetist*':ti,ab,kw OR 'critical care':ti,ab,kw OR 'intensive care':ti,ab,kw OR 'intensivist*':ti,ab,kw OR 'emergency physician*':ti,ab,kw OR 'resuscitation specialist*':ti,ab,kw OR 'anesthesia':ti,ab,kw OR 'anaesthesia':ti,ab,kw OR 'anaesthesiology':ti,ab,kw OR 'anesthesiology':ti,ab,kw OR 'anaesthetist*':ti,ab,kw OR 'anesthesiologist*':ti,ab,kw OR 'anaesthesiologist*':ti,ab,kw OR 'emergency health service':ti,ab,kw OR 'emergency doctor*':ti,ab,kw OR 'emergency specialist*':ti,ab,kw OR 'resuscitation physician*':ti,ab,kw OR 'resuscitation doctor*':ti,ab,kw OR 'intensive care unit':ti,ab,kw OR 'resuscitator':ti,ab,kw OR 'health care personnel':ti,ab,kw OR 'health care workers':ti,ab,kw OR 'health care worker':ti,ab,kw OR 'health care worker*':ti,ab,kw OR 'health worker*':ti,ab,kw OR 'health care provider*':ti,ab,kw OR 'health care personnel':ti,ab,kw OR 'health care professional*':ti,ab,kw OR 'health care personnel'/exp OR 'emergency department*':ti,ab,kw OR 'emergency medical service*':ti,ab,kw |
| <b>AND</b>                                                                                                                                                                                                                                                                                                                                                                                                                                                                                                                                                                                                                                                                                                                                                                                                                                                                                                                                                                                                                                                                                                                                                              |
| ('burnout':ti,ab,kw OR 'burn-out':ti,ab,kw OR 'burn out':ti,ab,kw OR 'professional burnout'/exp OR 'burnout'/exp OR 'job stress'/exp OR 'job stress':ti,ab,kw OR 'occupational stress':ti,ab,kw)                                                                                                                                                                                                                                                                                                                                                                                                                                                                                                                                                                                                                                                                                                                                                                                                                                                                                                                                                                        |
| <b>AND</b>                                                                                                                                                                                                                                                                                                                                                                                                                                                                                                                                                                                                                                                                                                                                                                                                                                                                                                                                                                                                                                                                                                                                                              |
| ('severe acute respiratory syndrome coronavirus 2':ti,ab,kw OR 'sars-coronavirus-2':ti,ab,kw OR 'sars cov 2':ti,ab,kw OR 'ncov':ti,ab,kw OR 'novel-coronavirus':ti,ab,kw OR 'novel-corona-virus':ti,ab,kw OR 'new-coronavirus':ti,ab,kw OR 'new-corona-virus':ti,ab,kw OR '2019ncov':ti,ab,kw OR 'coronavirus-disease-2019':ti,ab,kw OR 'corona-virus-disease-2019':ti,ab,kw OR 'coronavirus-disease-19':ti,ab,kw OR 'corona-virus-disease-19':ti,ab,kw OR 'coronavirus':ti,ab,kw OR 'covid-19':ti,ab,kw OR 'coronavirus disease 2019'/exp OR 'severe acute respiratory syndrome coronavirus 2'/exp)                                                                                                                                                                                                                                                                                                                                                                                                                                                                                                                                                                    |
| 'coronavirus disease 2019'/exp OR 'severe acute respiratory syndrome coronavirus 2'/exp                                                                                                                                                                                                                                                                                                                                                                                                                                                                                                                                                                                                                                                                                                                                                                                                                                                                                                                                                                                                                                                                                 |

|                                                                                                                                                                                                                                                                                                                                                                                                                                                                                                                                                                                                                                                                                                                                                                                                                                                                                                                                                                                                                                                                                                                                                                                                                                                                                                                                                        |
|--------------------------------------------------------------------------------------------------------------------------------------------------------------------------------------------------------------------------------------------------------------------------------------------------------------------------------------------------------------------------------------------------------------------------------------------------------------------------------------------------------------------------------------------------------------------------------------------------------------------------------------------------------------------------------------------------------------------------------------------------------------------------------------------------------------------------------------------------------------------------------------------------------------------------------------------------------------------------------------------------------------------------------------------------------------------------------------------------------------------------------------------------------------------------------------------------------------------------------------------------------------------------------------------------------------------------------------------------------|
| <b>Scopus</b>                                                                                                                                                                                                                                                                                                                                                                                                                                                                                                                                                                                                                                                                                                                                                                                                                                                                                                                                                                                                                                                                                                                                                                                                                                                                                                                                          |
| TITLE-ABS-KEY ( "anesthesia" ) OR TITLE-ABS-KEY ( "anaesthesia" ) OR TITLE-ABS-KEY ( "anaesthesiology"<br>) OR TITLE-ABS-KEY ( "anesthesiology" ) OR TITLE-ABS-KEY ( anesthetist* ) OR TITLE-ABS-KEY ( anaesthetist* ) OR TITLE-ABS-KEY ( anesthesiologist* ) OR TITLE-ABS-KEY ( anaesthesiologist* ) OR TITLE-ABS-KEY ( {critical care} ) OR TITLE-ABS-KEY ( {intensive care} ) OR TITLE-ABS-KEY ( icu ) OR TITLE-ABS-KEY ( intensivist* ) OR TITLE-ABS-KEY ( {emergency-physician*} ) OR TITLE-ABS-KEY ( {emergency physician} ) OR TITLE-ABS-KEY ( {emergency-doctor*} ) OR TITLE-ABS-KEY ( {emergency doctor*} ) OR TITLE-ABS-KEY ( {emergency-specialist*} ) OR TITLE-ABS-KEY ( {emergency specialist*} ) OR TITLE-ABS-KEY ( {resuscitation specialist*} ) OR TITLE-ABS-KEY ( {resuscitation-specialist*} ) OR TITLE-ABS-KEY ( resuscitator* ) OR TITLE-ABS-KEY ( {health care workers} ) OR TITLE-ABS-KEY ( {health care personnel} ) OR TITLE-ABS-KEY ( {emergency department*} ) OR TITLE-ABS-KEY ( {health worker*} ) OR TITLE-ABS-KEY ( {health care worker*} ) OR TITLE-ABS-KEY ( {health provider*} ) OR TITLE-ABS-KEY ( {health care provider*} ) OR TITLE-ABS-KEY ( {health personnel} ) OR TITLE-ABS-KEY ( {health care professional*} ) OR TITLE-ABS-KEY ( {health care personnel} ) OR TITLE-ABS-KEY ( {emergency medical service*} ) |
| <b>AND</b>                                                                                                                                                                                                                                                                                                                                                                                                                                                                                                                                                                                                                                                                                                                                                                                                                                                                                                                                                                                                                                                                                                                                                                                                                                                                                                                                             |
| ( TITLE-ABS-KEY ( {professional burnout} ) OR TITLE-ABS-KEY ( {burnout} ) OR TITLE-ABS-KEY ( {burn out} ) OR TITLE-ABS-KEY ( {burn-out} ) OR TITLE-ABS-KEY ( {job stress} ) OR TITLE-ABS-KEY ( {occupational stress} ) )                                                                                                                                                                                                                                                                                                                                                                                                                                                                                                                                                                                                                                                                                                                                                                                                                                                                                                                                                                                                                                                                                                                               |
| <b>AND</b>                                                                                                                                                                                                                                                                                                                                                                                                                                                                                                                                                                                                                                                                                                                                                                                                                                                                                                                                                                                                                                                                                                                                                                                                                                                                                                                                             |
| ( ( TITLE-ABS-KEY ( {severe acute respiratory syndrome coronavirus 2} ) OR TITLE-ABS-KEY ( {sars coronavirus 2} ) OR TITLE-ABS-KEY ( {sars-cov2} ) OR TITLE-ABS-KEY ( {ncov 2019 disease} ) OR TITLE-ABS-KEY ( {novel coronavirus} ) OR TITLE-ABS-KEY ( {novel-coronavirus} ) OR TITLE-ABS-KEY ( {new coronavirus} ) OR TITLE-ABS-KEY ( {new-coronavirus} ) OR TITLE-ABS-KEY ( {2019ncov} ) OR TITLE-ABS-KEY ( {coronavirus disease 2019} ) OR TITLE-ABS-KEY ( {sars cov 2} ) OR TITLE-ABS-KEY ( {coronavirus-disease 2019} ) ) )                                                                                                                                                                                                                                                                                                                                                                                                                                                                                                                                                                                                                                                                                                                                                                                                                      |

## PsycINFO

TI "anesthesiology" OR TI "anaesthesiology" OR TI "anesthesia" OR TI "anaesthesia" OR TI anesthetist\* OR TI anaesthetist\* OR TI anesthesiologist\* OR TI anaesthesiologist\* OR TI critical care OR TI intensive care OR TI icu OR TI "emergency services" OR TI "emergency-service\*" OR TI "emergency-physician\*" OR TI "emergency-doctor\*" OR TI "emergency-specialist\*" OR TI "resuscitation-physician\*" OR TI "resuscitation-doctor\*" OR TI "resuscitation-specialist\*" OR TI resuscitator\* TI "health care workers" OR DE anesthesiology OR DE anesthesiologist OR DE emergency department OR DE emergency room OR DE intensive care unit OR DE icu OR DE critical care OR DE critical care unit OR DE health care workers OR DE medical workers OR DE health care professionals OR AB anesthesiology OR AB "anaesthesiology" OR AB "anesthesia" OR AB "anaesthesia" OR AB anesthetist\* OR AB anaesthetist\* OR AB anesthesiologist\* OR AB anaesthesiologist\* OR AB critical care OR AB intensive care OR AB icu OR AB Emergency Services OR AB "emergency-service\*" OR AB emergency-physician\* OR AB "emergency-doctor\*" OR AB "emergency-specialist\*" OR AB "resuscitation-physician\*" OR AB "resuscitation-doctor\*" OR AB "resuscitation-specialist\*" OR AB "resuscitator\*" OR AB "health care worker\*" OR TI "health care worker\*" OR AB "health care worker\*" OR TI "health worker\*" OR AB "health worker\*" OR AB "health care provider\*" OR TI "health care provider\*" OR TI "health care personnel" OR AB "health care personnel" OR TI "health care professional\*" OR AB "health care professional\*" OR TI "health professional\*" OR AB "health professional\*" OR TI "health care personnel" OR AB "health care personnel" OR DE "health care worker"

**AND**

DE "burnout" OR DE "Occupational Stress" OR TI "occupational stress" OR TI "burnout" OR TI "burn-out" OR TI "burn out" OR TI "professional burnout" OR AB "occupational stress" OR AB "burnout" OR AB "burn-out" OR AB "burn out" OR AB "professional burnout"

**AND**

DE "Coronavirus" OR TI "coronavirus" OR AB "coronavirus" OR TI "severe-acute-respiratory-syndrome-coronavirus-2" OR AB "severe-acute-respiratory-syndrome-coronavirus-2" OR TI "SARS-Coronavirus-2" OR AB "SARS-Coronavirus-2" OR TI "sars cov 2" OR AB "sars cov 2" OR TI "nCoV" OR AB "nCoV" OR TI "novel-coronavirus" OR AB "novel-coronavirus" OR TI "novel-corona-virus" OR AB "novel-corona-virus" OR TI "new-coronavirus" OR AB "new-coronavirus" OR AB "new-corona-virus" OR TI "new-corona-virus" OR TI "2019nCoV" OR AB "2019nCoV" OR TI "2019-nCoV" OR AB "2019-nCoV" OR TI "coronavirus-disease-2019" OR AB "coronavirus-disease-2019" OR AB "corona-virus-disease-2019" OR TI "corona-virus-disease-2019" OR AB "coronavirus-disease-19" OR TI "coronavirus-disease-19" OR TI "corona-virus-disease-19" OR AB "coronavirus-disease-19" OR TI covid OR AB covid OR TI "COVID-19" OR AB "COVID-19"
